# Supplementary material
Source: PubMed Central journal article supplement (PMC7042946)
Supplement: jamapediatr-174-366-s001.pdf [file jamapediatr-174-366-s001.pdf]

## Supplementary Online Content

Sheldrick RC, Marakovitz S, Garfinkel D, Carter AS, Perrin EC. Comparative accuracy of developmental screening questionnaires. *JAMA Pediatr*. Published online February 17, 2020. doi:10.1001/jamapediatrics.2019.6000

**eTable 1.** Demographics of Children Who Completed and Did Not Complete Screening

**eTable 2.** Demographics of Children Who Completed and Did Not Complete Developmental Evaluations

**eTable 3.** Sensitivity and Specificity of Primary Screening Instruments by Severity of Delay

**eTable 4.** Frequencies and Unadjusted Estimates of Sensitivity and Specificity Among Referred Children

**eAppendix.** Additional Detail Regarding Protocol

This supplementary material has been provided by the authors to give readers additional information about their work.

**eTable 1.** Demographics of Children Who Completed and Did Not Complete Screening

|                   | Frequency (%) or Mean (SD) |                    | p-value |
|-------------------|----------------------------|--------------------|---------|
|                   | Completed screening        | Declined screening |         |
| n                 | 1495                       | 1052               |         |
| Child             |                            |                    |         |
| Age at enrollment | 2.6 (1.3)                  | 2.7 (1.4)          | 0.001   |
| Sex               |                            |                    |         |
| Male              | 779 (52.1)                 | 538 (51.1)         | 0.76    |
| Female            | 716 (47.9)                 | 514 (48.9)         |         |
| Race              |                            |                    |         |
| White             | 1102 (73.7)                | 707 (67.2)         | 0.001   |
| African-American  | 198 (13.2)                 | 132 (12.5)         | 0.59    |
| Asian             | 97 (6.5)                   | 72 (6.8)           | 0.73    |
| Other             | 98 (6.6)                   | 141 (13.4)         |         |
| Ethnicity         |                            |                    |         |
| Hispanic          | 268 (17.9)                 | 238 (22.6)         | 0.003   |
| Not Hispanic      | 1129 (75.5)                | 673 (64)           |         |

**eTable 2.** Demographics of Children Who Completed and Did Not Complete Developmental Evaluations

|                          | Frequency (%) or Mean (SD) |                     | p-value |
|--------------------------|----------------------------|---------------------|---------|
|                          | Completed evaluation       | Declined evaluation |         |
| n                        | 642                        | 309                 |         |
| Child                    |                            |                     |         |
| Age at enrollment        | 2.4 (1.3)                  | 2.4 (1.4)           | 0.96    |
| Age at evaluation        | 2.6 (1.3)                  | --                  | --      |
| Sex                      |                            |                     |         |
| Male                     | 353 (55)                   | 168 (54.4)          | 0.68    |
| Female                   | 289 (45)                   | 141 (45.6)          |         |
| Race                     |                            |                     |         |
| White                    | 458 (71.3)                 | 202 (65.4)          | 0.19    |
| African-American         | 89 (13.9)                  | 59 (19.1)           | 0.02    |
| Asian                    | 47 (7.3)                   | 20 (6.5)            | 0.71    |
| Other                    | 48 (7.5)                   | 28 (9.1)            |         |
| Ethnicity                |                            |                     |         |
| Hispanic                 | 121 (18.8)                 | 71 (23)             | 0.09    |
| Not Hispanic             | 473 (73.7)                 | 210 (68)            |         |
| Premature birth          | 76 (11.8)                  | 35 (11.3)           | 0.91    |
| Participating parent     |                            |                     |         |
| Sex                      |                            |                     |         |
| Male                     | 64 (10)                    | 43 (13.9)           | 0.71    |
| Female                   | 578 (90)                   | 266 (86.1)          |         |
| Prefers Spanish language | 24 (3.7)                   | 13 (4.2)            | 0.66    |
| Marital Status           |                            |                     |         |
| Married                  | 452 (70.4)                 | 181 (58.6)          | 0.001   |
| Not Married              | 166 (25.9)                 | 115 (37.2)          |         |
| Age, mean years (SD)     | 33.5 (6.4)                 | 32 (6.2)            | 0.001   |
| Education                |                            |                     |         |
| High School or less      | 205 (31.9)                 | 138 (44.7)          | 0.001   |
| Some college             | 88 (13.7)                  | 49 (15.9)           |         |
| College degree           | 185 (28.8)                 | 65 (21)             |         |
| Graduate degree          | 164 (25.5)                 | 51 (16.5)           |         |
| not indicated            | 0 (0)                      | 6 (1.9)             |         |
| Family income, \$        |                            |                     |         |
| <30,000                  | 84 (13.1)                  | 32 (10.4)           | 0.23    |
| 30,000-49,999            | 43 (6.7)                   | 22 (7.1)            |         |
| 50,000-99,999            | 121 (18.8)                 | 52 (16.8)           |         |
| >=100,000                | 186 (29)                   | 54 (17.5)           |         |
| not indicated            | 208 (32.4)                 | 149 (48.2)          |         |
| Public health insurance  | 143 (22.3)                 | 76 (24.6)           | 0.36    |

**eTable 3.** Sensitivity and Specificity of Primary Screening Instruments by Severity of Delay

|                                        | Younger children (0-42 months) |                         |                         |                            |
|----------------------------------------|--------------------------------|-------------------------|-------------------------|----------------------------|
|                                        | Sensitivity                    |                         |                         | Specificity<br>(no delays) |
|                                        | Severe Delays (4.0%)           | Moderate Delays (9.5%)  | Mild Delays (14.5%)     |                            |
| <b>Primary Aim:</b>                    |                                |                         |                         |                            |
| SWYC Milestones                        | 73.7% [CI: 50.1%-88.6%]        | 51.7% [CI: 39.1%-64.0%] | 33.1% [CI: 21.7%-47.0%] | 89.0% [CI: 86.1%-91.4%]    |
| ASQ-3                                  | 60.0% [CI: 29.7%-84.2%]        | 50.0% [CI: 30.2%-69.8%] | 23.1% [CI: 9.7%-45.5%]  | 89.4% [CI: 85.9%-92.1%]    |
| PEDS                                   | 78.9% [CI: 55.4%-91.9%]        | 54.0% [CI: 41.6%-65.8%] | 28.0% [CI: 17.9%-40.9%] | 79.6% [CI: 75.7%-83.1%]    |
| <b>Secondary Aim:</b>                  |                                |                         |                         |                            |
| PEDS:DM                                | 60.8% [CI: 49.6%-71.0%]        | 81.0% [CI: 66.2%-90.2%] | 67.2% [CI: 40.0%-86.3%] | 42.7% [CI: 30.2%-56.2%]    |
| PEDS AND PEDS:DM                       | 78.9% [CI: 55.4%-91.9%]        | 47.6% [CI: 35.6%-59.9%] | 22.7% [CI: 14.1%-34.4%] | 83.9% [CI: 80.3%-86.9%]    |
| SWYC: somewhat concerned               | 66.7% [CI: 33.2%-89.0%]        | 32.5% [CI: 19.8%-48.3%] | 22.4% [CI: 12.6%-36.8%] | 95.5% [CI: 93.1%-97.1%]    |
| SWYC: very concerned                   | 11.1% [CI: 1.5%-50.2%]         | 2.5% [CI: 0.3%-15.9%]   | 1.5% [CI: 0.2%-10.2%]   | 97.4% [CI: 92.1%-99.2%]    |
| SWYC Milestones OR somewhat concerned  | 89.5% [CI: 66.1%-97.4%]        | 56.7% [CI: 43.9%-68.6%] | 39.9% [CI: 26.7%-54.9%] | 87.3% [CI: 84.2%-89.8%]    |
| SWYC Milestones AND somewhat concerned | 57.9% [CI: 35.5%-77.4%]        | 31.7% [CI: 21.2%-44.4%] | 19.3% [CI: 11.7%-30.2%] | 95.8% [CI: 93.7%-97.2%]    |
|                                        | Older children (43-66 months)  |                         |                         |                            |
|                                        | Sensitivity                    |                         |                         | Specificity<br>(no delays) |
| <b>Primary Aim:</b>                    | Severe Delays (8.3%)           | Moderate Delays (10.2%) | Mild Delays (15.7%)     |                            |
| SWYC Milestones                        | 44.4% [CI: 17.5%-75.1%]        | 36.3% [CI: 11.0%-72.3%] | 53.8% [CI: 38.2%-68.8%] | 70.7% [CI: 60.9%-78.8%]    |
| ASQ-3                                  | 50.0% [CI: 12.2%-87.8%]        | 33.3% [CI: 8.3%-73.5%]  | 20.5% [CI: 10.5%-36.1%] | 92.1% [CI: 85.1%-95.9%]    |
| PEDS                                   | 77.8% [CI: 41.8%-94.5%]        | 28.2% [CI: 8.5%-62.4%]  | 66.7% [CI: 50.5%-79.7%] | 73.7% [CI: 64.3%-81.3%]    |
| <b>Secondary Aim:</b>                  |                                |                         |                         |                            |
| PEDS:DM                                | 87.4% [CI: 78.3%-93.1%]        | 86.9% [CI: 79.4%-92.0%] | 85.7% [CI: 56.7%-96.5%] | 13.1% [CI: 6.7%-23.9%]     |
| PEDS AND PEDS:DM                       | 77.8% [CI: 41.8%-94.5%]        | 35.9% [CI: 12.4%-69.1%] | 61.5% [CI: 45.5%-75.4%] | 78.8% [CI: 70.2%-85.4%]    |
| SWYC: somewhat concerned               | 80.0% [CI: 30.4%-97.3%]        | 32.1% [CI: 8.4%-71.0%]  | 31.3% [CI: 17.6%-49.2%] | 93.6% [CI: 87.2%-96.9%]    |
| SWYC: very concerned                   | 40.0% [CI: 9.8%-80.3%]         | 4.6% [CI: 0.5%-31.4%]   | 2.0% [CI: 0.6%-6.2%]    | 99.2% [CI: 94.4%-99.9%]    |
| SWYC Milestones OR somewhat concerned  | 55.6% [CI: 24.9%-82.5%]        | 50.3% [CI: 16.3%-84%]   | 59% [CI: 43%-73.2%]     | 70.0% [CI: 60.1%-78.3%]    |
| SWYC Milestones AND somewhat concerned | 44.4% [CI: 17.5%-75.1%]        | 50.3% [CI: 16.3%-84%]   | 28.2% [CI: 16.3%-44.3%] | 87.9% [CI: 81%-92.5%]      |

Note. ASQ = Ages & Stages Questionnaire; PEDS = Parents' Evaluation of Developmental Status; SWYC = Survey of Wellbeing of Young Children

**eTable 4.** Frequencies and Unadjusted Estimates of Sensitivity and Specificity Among Referred Children

©2020 American Medical Association. All rights reserved.

|                                           | Younger children (9-42 months)        |                                          |                                      |                                                  |
|-------------------------------------------|---------------------------------------|------------------------------------------|--------------------------------------|--------------------------------------------------|
|                                           | Positive score (Sensitivity)          |                                          |                                      | Negative Score<br>(Specificity)<br>n=302 (62.7%) |
| <b>Primary Aim:</b>                       | <b>Severe Delays;<br/>n=21 (4.4%)</b> | <b>Moderate Delays;<br/>n=69 (14.3%)</b> | <b>Mild Delays;<br/>n=90 (18.7%)</b> |                                                  |
| SWYC Milestones                           | n=15 (71.4%)                          | n=35 (50.7%)                             | n=37 (41.1%)                         | n=236 (78.1%)                                    |
| ASQ-3                                     | n=14 (66.7%)                          | n=35 (50.7%)                             | n=40 (44.4%)                         | n=229 (75.8%)                                    |
| PEDS                                      | n=16 (76.2%)                          | n=36 (52.2%)                             | n=34 (37.8%)                         | n=184 (60.9%)                                    |
| <b>Secondary Aim:</b>                     |                                       |                                          |                                      |                                                  |
| PEDS:DM                                   | n=21 (100%)                           | n=57 (82.6%)                             | n=67 (74.4%)                         | n=113 (37.4%)                                    |
| PEDS AND PEDS:DM                          | n=16 (76.2%)                          | n=32 (46.4%)                             | n=28 (31.1%)                         | n=207 (68.5%)                                    |
| SWYC: somewhat concerned                  | n=14 (66.7%)                          | n=22 (31.9%)                             | n=24 (26.7%)                         | n=274 (90.7%)                                    |
| SWYC: very concerned                      | n=2 (9.5%)                            | n=2 (2.9%)                               | n=2 (2.2%)                           | n=302 (100%)                                     |
| SWYC Milestones OR<br>somewhat concerned  | n=18 (85.7%)                          | n=38 (55.1%)                             | n=44 (48.9%)                         | n=226 (74.8%)                                    |
| SWYC Milestones AND<br>somewhat concerned | n=12 (57.1%)                          | n=23 (33.3%)                             | n=23 (25.6%)                         | n=274 (90.7%)                                    |
|                                           | Older children (43-66 months)         |                                          |                                      |                                                  |
|                                           | Positive score (Sensitivity)          |                                          |                                      | Negative Score<br>(Specificity)<br>n=89 (57.8%)  |
| <b>Primary Aim:</b>                       | <b>Severe Delays;<br/>n=10 (6.5%)</b> | <b>Moderate Delays;<br/>n=15 (9.7%)</b>  | <b>Mild Delays;<br/>n=40 (26%)</b>   |                                                  |
| SWYC Milestones                           | n=5 (50%)                             | n=9 (60%)                                | n=21 (52.5%)                         | n=43 (48.3%)                                     |
| ASQ-3                                     | n=6 (60%)                             | n=7 (46.7%)                              | n=8 (20%)                            | n=73 (82%)                                       |
| PEDS                                      | n=8 (80%)                             | n=7 (46.7%)                              | n=27 (67.5%)                         | n=47 (52.8%)                                     |
| <b>Secondary Aim:</b>                     |                                       |                                          |                                      |                                                  |
| PEDS:DM                                   | n=10 (100%)                           | n=15 (100%)                              | n=34 (85%)                           | n=22 (24.7%)                                     |
| PEDS AND PEDS:DM                          | n=8 (80%)                             | n=7 (46.7%)                              | n=25 (62.5%)                         | n=55 (61.8%)                                     |
| SWYC: somewhat concerned                  | n=8 (80%)                             | n=7 (46.7%)                              | n=13 (32.5%)                         | n=78 (87.6%)                                     |
| SWYC: very concerned                      | n=4 (40%)                             | n=0 (0%)                                 | n=0 (0%)                             | n=88 (98.9%)                                     |
| SWYC Milestones OR<br>somewhat concerned  | n=6 (60%)                             | n=11 (73.3%)                             | n=23 (57.5%)                         | n=42 (47.2%)                                     |
| SWYC Milestones AND<br>somewhat concerned | n=5 (50%)                             | n=6 (40%)                                | n=11 (27.5%)                         | n=70 (78.7%)                                     |

Note. ASQ = Ages & Stages Questionnaire; PEDS = Parents' Evaluation of Developmental Status; SWYC = Survey of Wellbeing of Young Children

## eAppendix. Additional Detail Regarding Protocol

### Introduction

Increasing numbers of states and professional organizations are recommending and even mandating systematic screening for developmental delays among young children in pediatric settings. Unfortunately, there is a weak evidence base from which pediatricians are forced to make decisions to inform such screening. To address the considerable gaps in the research literature on screening, we aimed to conduct a large, diagnostic accuracy study to compare 3 sets of developmental-behavioral screening instruments for children under 5 years of age (the Ages and Stages Questionnaire, the Parent's Evaluation of Developmental Status, and our own instrument, the Survey of Wellbeing on Young Children). The importance of accuracy for a screening instrument is widely acknowledged. If even a modest proportion of pediatricians adopted a more sensitive screening instrument, a large number of additional children with developmental-behavioral disorders would be identified and thus have the opportunity to receive appropriate interventions. A corresponding increase in specificity would result in a dramatic reduction in the number of false positive cases, thereby alleviating burden on primary care pediatricians, specialists, and parents.

For this reason, studies that estimate sensitivity and specificity of developmental screening questionnaires abound. We cite two primary sources of evidence regarding the sensitivity and specificity of the ASQ and the PEDS: the systematic review conducted to support recommendations of the Canadian Task Force on Preventive Health Care (which cites four studies), and the American Academy of Pediatrics (AAP) consensus statement on developmental screening (which cites the ASQ and PEDS manuals). For the SWYC Milestones, we rely on the original published study. Further detail regarding the population, age-group, and reference standards included in these studies are provided in the table below.

### Methods

#### *Developmental assessment*

Child assessment visits were conducted by trained examiners, supervised by a licensed psychologist, and videotaped for later review. Specifically, 12 research staff administered developmental testing over the course of the study. The same two clinicians (one supervising clinical psychologist and one bilingual developmental-behavioral pediatrician) provided supervision regarding developmental testing throughout the study. All testing was videotaped unless the participant requested to opt-out (which did not otherwise affect eligibility). The tapes were reviewed by the study clinicians to ensure adherence to protocol and to advise research assistants regarding administration and scoring to ensure fidelity.

#### *Analyses*

Sampling strategy. Our design takes advantage of the fact that children who score negative on any given screening instrument actually represent two different populations: (1) those who score positive on at least one other screening instrument for development, behavior or autism, and (2) those who score negative on all screening instruments. By inviting 100% children in group #1 for evaluations, our design oversamples children who are most likely to represent false negatives for any single screening instruments (i.e., those who screen positive on a different screening instrument). Moreover, these children are the most important ones to evaluate when comparing the accuracy of screening instruments because they populate the discrepant cells (i.e., instances of disagreement reflecting positive scores on one test but negative on another) in analyses of dependent samples. The decision to sample 10% of children who screen negative applies only to group #2—those who score negative on all screening instruments. Sampling of this group of children can influence overall estimates of accuracy, but in a way that influences estimates for all screeners equivalently (e.g., these children are either true negatives or false negatives on every screener). Thus, comparisons among screeners are unaffected. The *a priori* power estimates we conducted suggested that 10% would be sufficient, and this sampling is reflected by our inverse probability weights and therefore the confidence intervals we report in this paper. Therefore, the confidence intervals we report should be generalizable to pediatric populations.

Statistical Analyses. To estimate and compare sensitivity and specificity for each questionnaire we used generalized estimating equations (GEEs) with logit links to simultaneously estimate true and false positive fractions and their 95% confidence intervals. We included covariates and their interactions with screener-type to account for administration in Spanish and for use of an earlier edition of the ASQ. To account for severity, we separately

assessed sensitivity to mild, moderate, and severe delays and then calculated specificity among children with no evidence of delay. From these statistics, we also calculated positive predictive value (PPV), negative predictive value (NPV), positive likelihood ratio (LR+) and negative likelihood ratio (LR-) with respect to mild-to-severe delays. The method of using GEEs to estimate the effects of covariates on sensitivity and specificity was developed by Pepe and colleagues in a series of papers<sup>1,2</sup> and detailed in a published book.<sup>3</sup> We chose this approach because it is, to our knowledge, the only regression-based method that supports estimation and comparison of key indicators of diagnostic accuracy based on dependent samples, as employed in this study. As the authors note, “Surprisingly, statistical methods for comparing tests with regard to [diagnostic accuracy] parameters have not been available for the most common study design in which each test is applied to each study individual. [Therefore,] we propose a statistic for comparing the predictive values of two diagnostic tests using this paired study design. The proposed statistic is a score statistic derived from a marginal regression model and bears some relation to McNemar's statistic. As McNemar's statistic can be used to compare sensitivities and specificities of diagnostic tests, parameters that condition on disease status, our statistic can be considered as an analog of McNemar's test for the problem of comparing predictive values, parameters that condition on test outcome.”<sup>1</sup>

**Table. Further detail regarding validation studies for ASQ, PEDS, and SWYC**

| Reference               | Population                                                                                                                   |             |                       | Screener     |                                             | Reference standard                                      |                                                                              |
|-------------------------|------------------------------------------------------------------------------------------------------------------------------|-------------|-----------------------|--------------|---------------------------------------------|---------------------------------------------------------|------------------------------------------------------------------------------|
|                         | sample                                                                                                                       | location    | age                   | type         | rule                                        | type                                                    | clinical threshold                                                           |
| Rydz et al 2006         | primary care                                                                                                                 | US          | 18 mo                 | ASQ          | <2 SD on ≥1 domain                          | Battelle Developmental Inventory                        | not reported                                                                 |
| Steenis et al., 2015    | convenience                                                                                                                  | Netherlands | 2-42 mo               | ASQ-III      | <2 SD                                       | Bayley-III NL                                           | 2 SD                                                                         |
| Limbos et al., 2011     | primary care                                                                                                                 | Canada      | 12-60 mo              | ASQ-II, PEDS | <2 SD on ASQ; ≥1 predictive concern on PEDS | Bayley-III, WISC-3, PLS-4 + VABS-2                      | <10 <sup>th</sup> %tile                                                      |
| Gollenberg et al., 2009 | convenience sample enrolled in longitudinal study                                                                            | US          | 24 mo                 | ASQ-II       | <2 SD                                       | Bayley-II                                               | < 1 SD & < 2 SD                                                              |
| PEDS manual             | Primary sample: Self-selected parents who used PEDS Online plus parents who completed PEDS during well-child visits          | US          | M = 35 mo (0-6 years) | PEDS         | Predictive concern                          | “eligible for services via diagnostic testing”          | varied by state criteria: “e.g., two 25% delays, 1 ½ sd below the mean, etc” |
| ASQ-III manual          | “Identified group” from EI/ECSE programs and a “typical group” from child care centers, preschool programs, and internet ads | US          | 2-60 months           | ASQ-3        | <2 SD below mean in one or more areas       | Battelle Developmental Inventory “in over 90% of cases” | <75 on any scale or subscale                                                 |

|                          |              |    |             |               |       |                                      |     |
|--------------------------|--------------|----|-------------|---------------|-------|--------------------------------------|-----|
| Sheldrick & Perrin, 2013 | primary care | US | 2-66 months | SWYC, ASQ-III | <2 SD | Parent-report of developmental delay | N/A |
|--------------------------|--------------|----|-------------|---------------|-------|--------------------------------------|-----|

Based on estimates of sensitivity, specificity, and prevalence reported in Table 2, additional parameters were estimated as follows:

$$PPV = \frac{\text{sensitivity} * \text{prevalence}}{\text{sensitivity} * \text{prevalence} + (1 - \text{specificity}) * (1 - \text{prevalence})}$$

$$NPV = \frac{\text{specificity} * (1 - \text{prevalence})}{\text{specificity} * (1 - \text{prevalence}) + (1 - \text{sensitivity}) * \text{prevalence}}$$

$$LR_+ = \frac{\text{sensitivity}}{1 - \text{specificity}}$$

$$LR_- = \frac{1 - \text{sensitivity}}{\text{specificity}}$$

$$DOR = \frac{LR_+}{LR_-}$$

#### References

1. Leisenring W, Alono T, Pepe MS. Comparisons of predictive values of binary medical diagnostic tests for paired designs. *Biometrics*. 2000;56(2):345-351.
2. Moskowitz CS, Pepe MS. Comparing the predictive values of diagnostic tests: sample size and analysis for paired study designs. *Clinical trials*. 2006;3: 272-279.
3. Pepe MS. *The statistical evaluation of medical tests for classification and prediction*. Oxford; 2003.
